# Supplementary figures and images for: A Remote Surveillance Platform to Monitor General Care Ward Surgical Patients for Acute Physiologic Deterioration
Source: PubMed Central journal article supplement — Anesth Analg. 2021 Apr 8;133(4):933–9. doi: 10.1213/ANE.0000000000005530 (PMC8415733; doi:10.1213/ane.0000000000005530), 2021-04-08

Appendix Figure 1

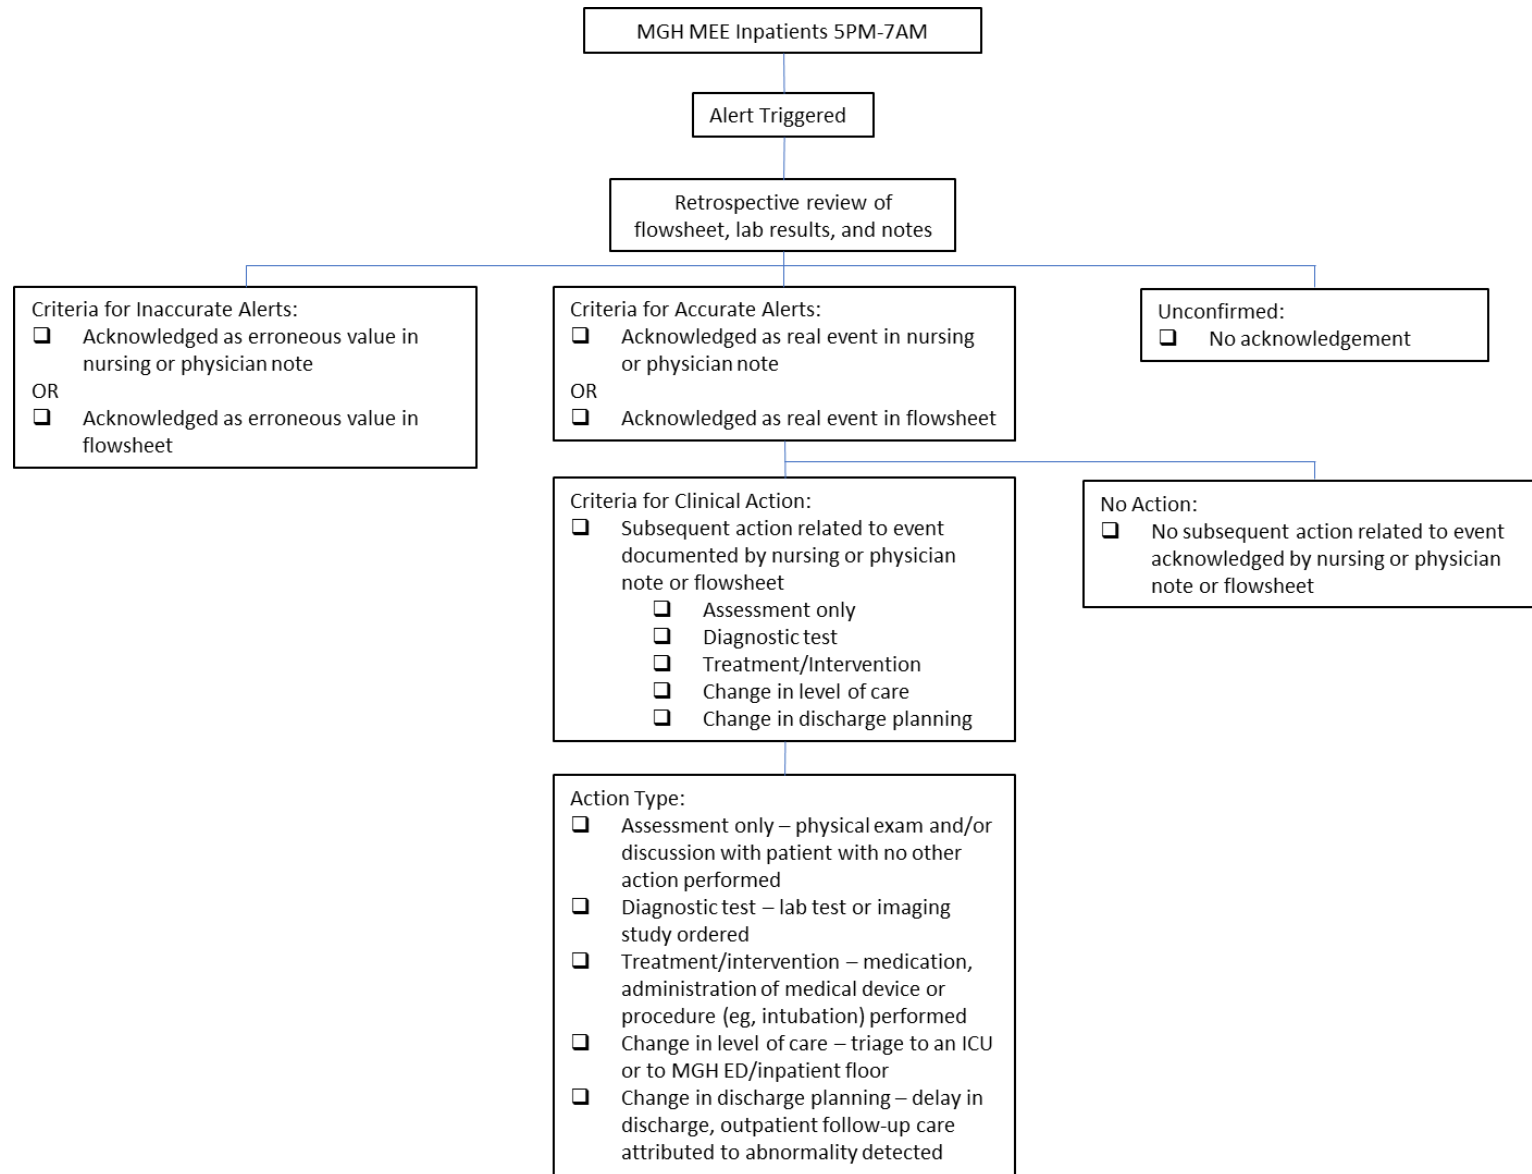

Supplement: ane-133-933-s001.pdf [file ane-133-933-s001.pdf]
